# Supplementary material for: Evaluation of Lesions and Viral Antigen Distribution in Domestic Pigs Inoculated Intranasally with African Swine Fever Virus Ken05/Tk1 (Genotype X)
Source: MDPI journal article supplement (doi:10.3390/pathogens10060768), 2021-06-18

**Occasional (score: 1)**

**Mild (score: 2)**

**Moderate (score: 3)**

**Abundant (score: 4)**

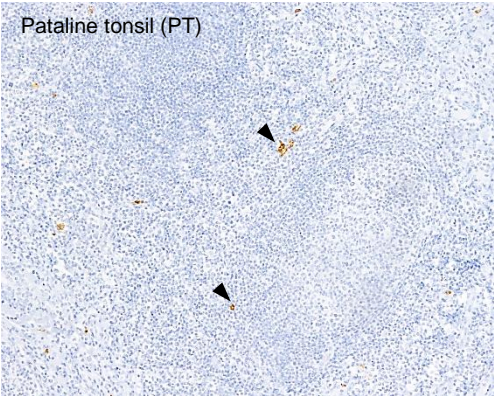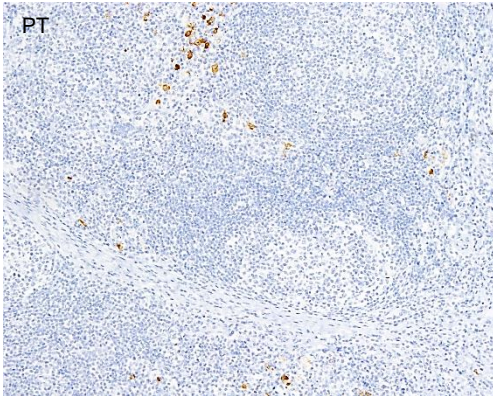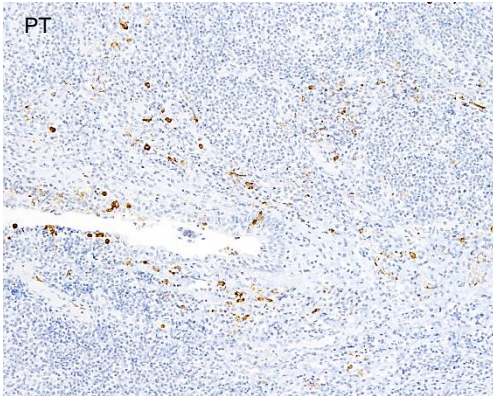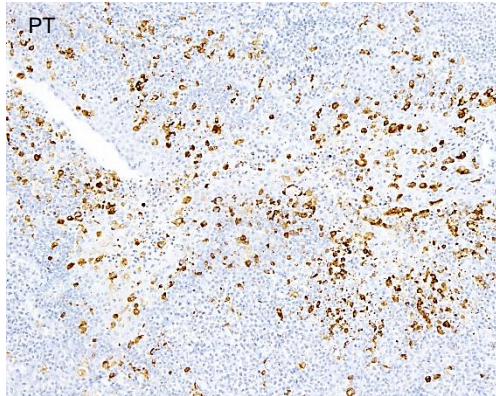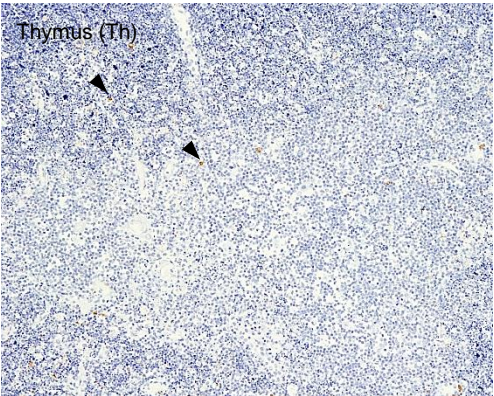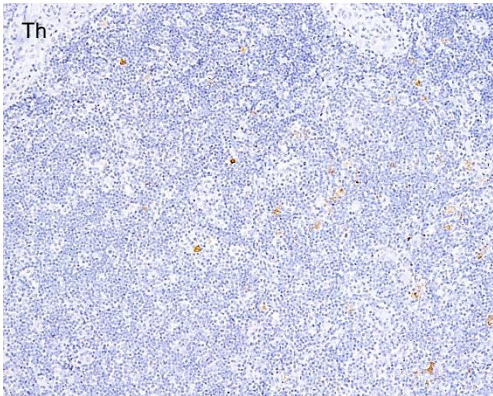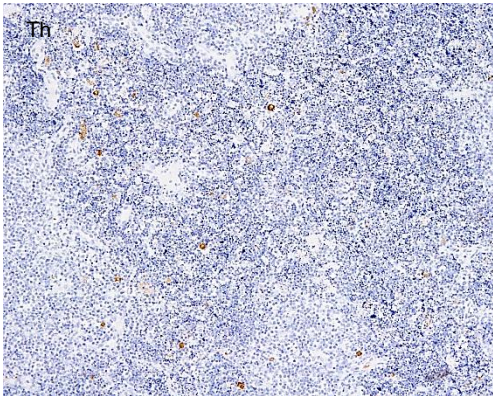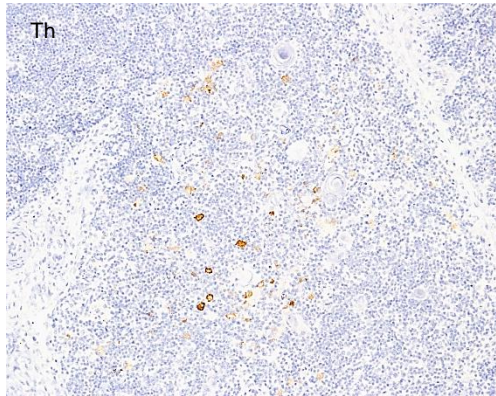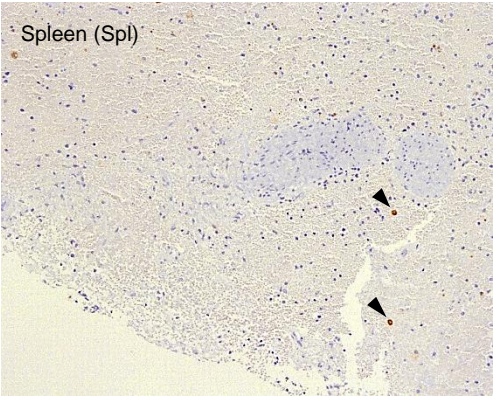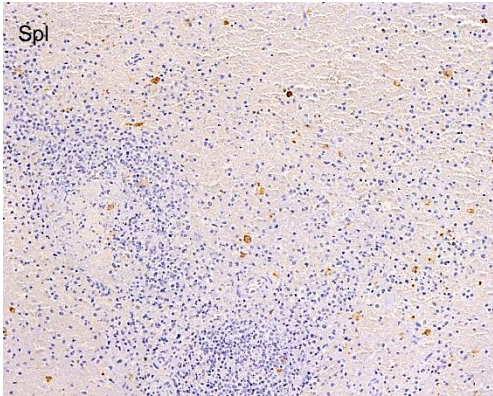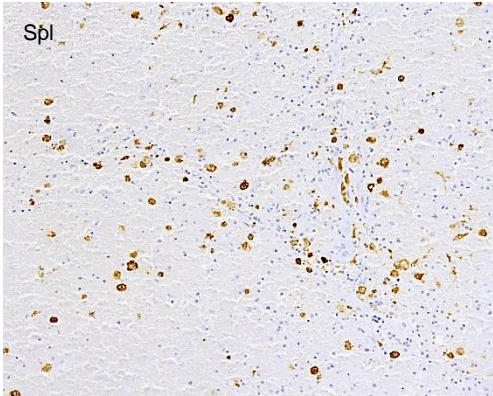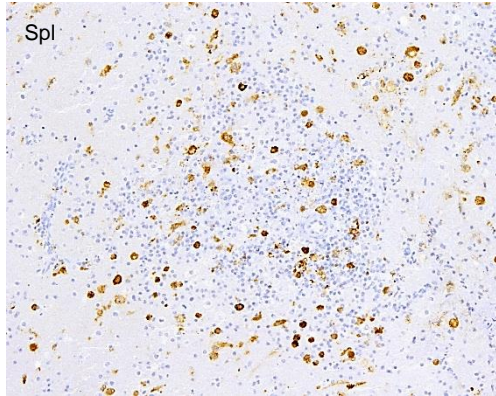



**Occasional (score: 1)**

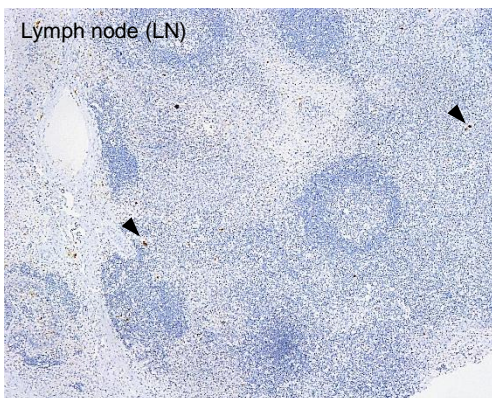

**Mild (score: 2)**

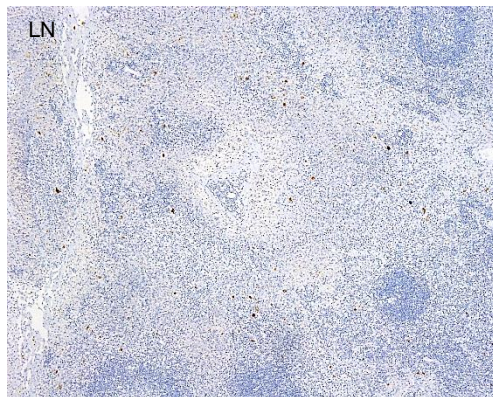

**Moderate (score: 3)**

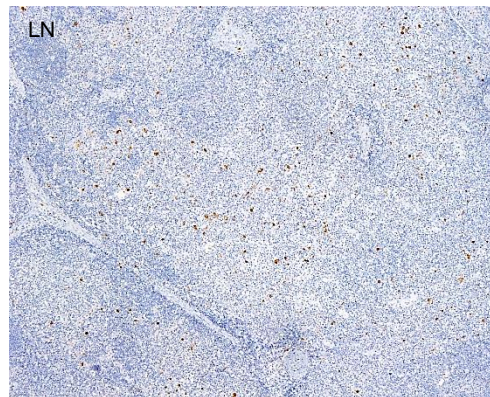

**Abundant (score: 4)**

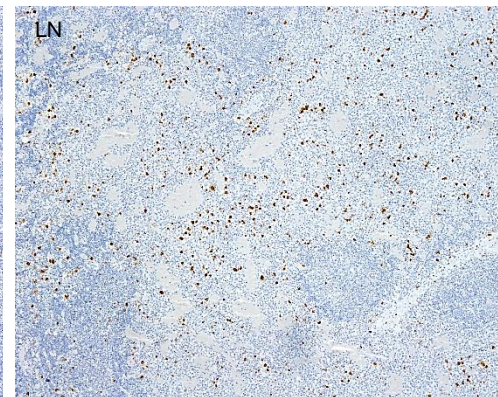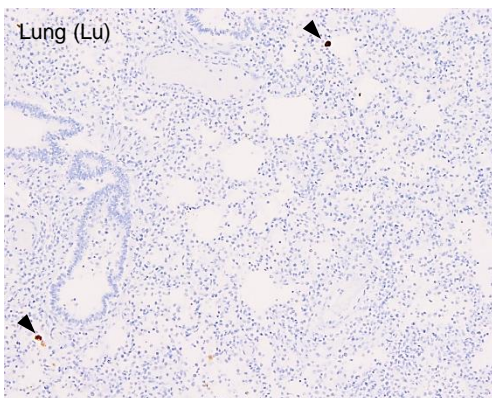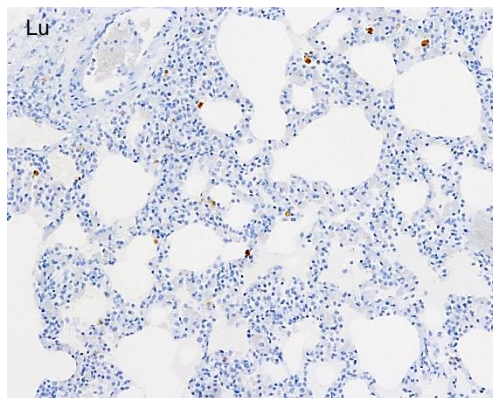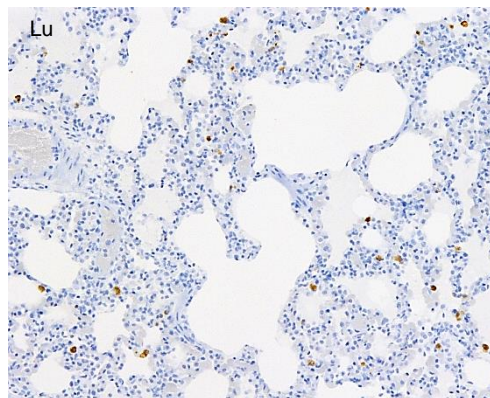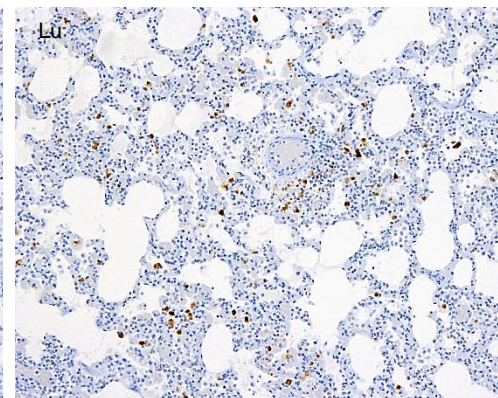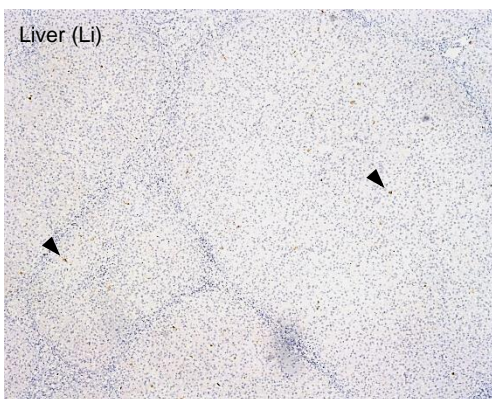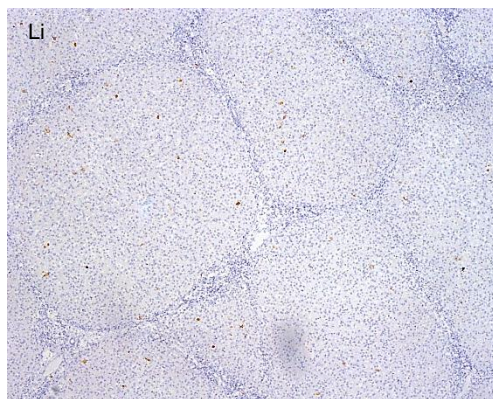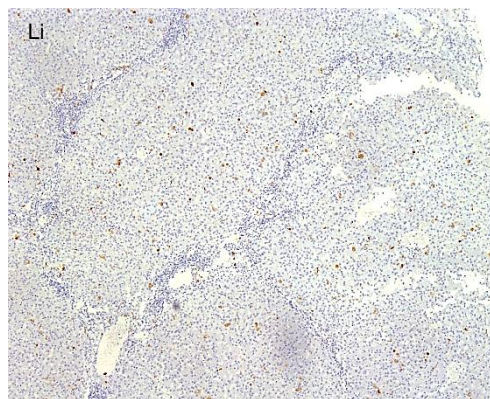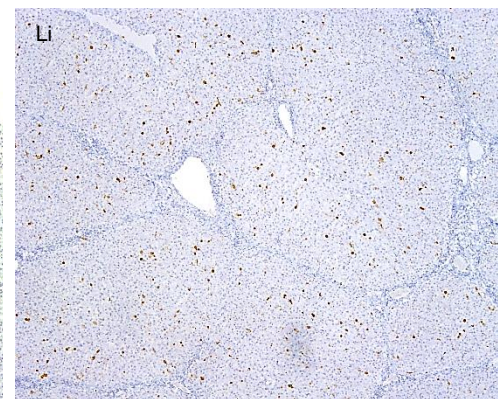

Supplement: s1 [file s1]
