# Supplementary material for: Evaluation of Lesions and Viral Antigen Distribution in Domestic Pigs Inoculated Intranasally with African Swine Fever Virus Ken05/Tk1 (Genotype X)
Source: MDPI journal article supplement (doi:10.3390/pathogens10060768), 2021-06-18
Supplement: s1 [file s1]

| <b>Positive cells<br/>(IHC-p30/CP204L)</b> | <b>Pig No.</b> | <b>Pig No.</b> | <b>Pig No.</b> | <b>Pig No.</b> | <b>Observations/notes</b> |
|--------------------------------------------|----------------|----------------|----------------|----------------|---------------------------|
| <b>Lung</b> (pulmonary lobe: )*            |                |                |                |                |                           |
| -PIMs/Interstitial Mos                     |                |                |                |                |                           |
| -PAMs                                      |                |                |                |                |                           |
| -BALT                                      |                |                |                |                |                           |
| -Pneumocytes                               |                |                |                |                |                           |
| -Other cells/areas                         |                |                |                |                |                           |
|                                            |                |                |                |                |                           |
| <b>Lung</b> (pulmonary lobe: )*            |                |                |                |                |                           |
| -PIMs/Interstitial Mos                     |                |                |                |                |                           |
| -PAMs                                      |                |                |                |                |                           |
| -BALT                                      |                |                |                |                |                           |
| -Pneumocytes                               |                |                |                |                |                           |
| -Other cells/areas                         |                |                |                |                |                           |
|                                            |                |                |                |                |                           |

\*The morphological identification of cells immunolabeled against viral antigen in each of the histological areas/structures evaluated must be also included.

(Mos): macrophages.

(PIM): pulmonary intravascular macrophages.

(PAM): pulmonary alveolar macrophages.

(BALT): bronchus-associated lymphoid tissue.

**Scoring of cells immunolabeled for viral antigen: (0)** no presence of immunolabeled cells; **(1)** occasional presence of immunolabeled cells; **(2)** mild presence of immunolabeled cells; **(3)** moderate presence of immunolabeled cells; **(4)** abundant presence of immunolabeled cells.

| <b>Positive cells<br/>(IHC-p30/CP204L)</b> | <b>Pig No.</b> | <b>Pig No.</b> | <b>Pig No.</b> | <b>Pig No.</b> | <b>Observations/notes</b> |
|--------------------------------------------|----------------|----------------|----------------|----------------|---------------------------|
| <b>Distal ileum*</b>                       |                |                |                |                |                           |
| -Epithelium                                |                |                |                |                |                           |
| -Lamina propria                            |                |                |                |                |                           |
| -Lymphoid follicles (LF)                   |                |                |                |                |                           |
| -Interfollicular areas                     |                |                |                |                |                           |
| -Other cells/areas                         |                |                |                |                |                           |
| <b>Ileocaecal valve*</b>                   |                |                |                |                |                           |
| -Epithelium                                |                |                |                |                |                           |
| -Lamina propria                            |                |                |                |                |                           |
| -Lymphoid follicles (LF)                   |                |                |                |                |                           |
| -Interfollicular areas                     |                |                |                |                |                           |
| -Other cells/areas                         |                |                |                |                |                           |
| <b>Colon*</b>                              |                |                |                |                |                           |
| -Epithelium                                |                |                |                |                |                           |
| -Lamina propia                             |                |                |                |                |                           |
| -Submucosa (occasional LF)                 |                |                |                |                |                           |
| -Other cells/areas                         |                |                |                |                |                           |
| <b>Kidney*</b>                             |                |                |                |                |                           |
| -Glomeruli (cortex)                        |                |                |                |                |                           |
| -Interstitial infiltrates (cortex)         |                |                |                |                |                           |
| -Medulla                                   |                |                |                |                |                           |
| -Renal pelvis                              |                |                |                |                |                           |
| -Other cells/areas                         |                |                |                |                |                           |

\*The morphological identification of cells immunolabeled against viral antigen in each of the histological areas/structures evaluated must be also included.

**Scoring of cells immunolabeled for viral antigen:** **(0)** no presence of immunolabeled cells; **(1)** occasional presence of immunolabeled cells; **(2)** mild presence of immunolabeled cells; **(3)** moderate presence of immunolabeled cells; **(4)** abundant presence of immunolabeled cells.

| <b>Positive cells<br/>(IHC-p30/CP204L)</b>                | <b>Pig No.</b> | <b>Pig No.</b> | <b>Pig No.</b> | <b>Pig No.</b> | <b>Observations/notes</b> |
|-----------------------------------------------------------|----------------|----------------|----------------|----------------|---------------------------|
| <b>Spleen*</b><br>-Red pulp                               |                |                |                |                |                           |
| -Lymphoid follicles                                       |                |                |                |                |                           |
| -Periarteriolar lymphoid sheaths                          |                |                |                |                |                           |
| -Ellipsoids                                               |                |                |                |                |                           |
| -Other cells/areas                                        |                |                |                |                |                           |
| <b>Thymus*</b><br>-Cortex                                 |                |                |                |                |                           |
| -Corticomedullary junction.                               |                |                |                |                |                           |
| -Medulla                                                  |                |                |                |                |                           |
| -Other cells/areas                                        |                |                |                |                |                           |
| <b>Tonsil*</b><br>-Epithelium (crypts)/lamina.<br>propria |                |                |                |                |                           |
| -Lymphoid follicles                                       |                |                |                |                |                           |
| -Interfollicular areas                                    |                |                |                |                |                           |
| -Other cells/areas                                        |                |                |                |                |                           |

\*The morphological identification of cells immunolabeled against viral antigen in each of the histological areas/structures evaluated must be also included.

**Scoring of cells immunolabeled for viral antigen:** (0) no presence of immunolabeled cells; (1) occasional presence of immunolabeled cells; (2) mild presence of immunolabeled cells; (3) moderate presence of immunolabeled cells; (4) abundant presence of immunolabeled cells.

| <b>Positive cells<br/>(IHC-p30/CP204L)</b> | <b>Pig No.</b> | <b>Pig No.</b> | <b>Pig No.</b> | <b>Pig No.</b> | <b>Observations/notes</b> |
|--------------------------------------------|----------------|----------------|----------------|----------------|---------------------------|
| <b>Lymph nodes*LN identification:</b>      |                |                |                |                |                           |
| -Lymphoid follicles                        |                |                |                |                |                           |
| -Interfollicular areas                     |                |                |                |                |                           |
| -Medulla                                   |                |                |                |                |                           |
| -Other cells/area                          |                |                |                |                |                           |
| <b>LN identification:*</b>                 |                |                |                |                |                           |
| -Lymphoid follicles                        |                |                |                |                |                           |
| -Interfollicular areas                     |                |                |                |                |                           |
| -Medulla                                   |                |                |                |                |                           |
| -Other cells/area                          |                |                |                |                |                           |
| <b>LN identification:*</b>                 |                |                |                |                |                           |
| -Lymphoid follicles                        |                |                |                |                |                           |
| -Interfollicular areas                     |                |                |                |                |                           |
| -Medulla                                   |                |                |                |                |                           |
| -Other cells/area                          |                |                |                |                |                           |
| <b>LN identification:*</b>                 |                |                |                |                |                           |
| -Lymphoid follicles                        |                |                |                |                |                           |
| -Interfollicular areas                     |                |                |                |                |                           |
| -Medulla                                   |                |                |                |                |                           |
| -Other cells/area                          |                |                |                |                |                           |
| <b>LN identification:*</b>                 |                |                |                |                |                           |
| -Lymphoid follicles                        |                |                |                |                |                           |
| -Interfollicular areas                     |                |                |                |                |                           |
| -Medulla                                   |                |                |                |                |                           |
| -Other cells/area                          |                |                |                |                |                           |
| <b>LN identification:*</b>                 |                |                |                |                |                           |
| -Lymphoid follicles                        |                |                |                |                |                           |
| -Interfollicular areas                     |                |                |                |                |                           |
| -Medulla                                   |                |                |                |                |                           |
| -Other cells/area                          |                |                |                |                |                           |

\*The morphological identification of cells immunolabeled against viral antigen in each of the histological areas/structures evaluated must be also included.

**Scoring of cells immunolabeled for viral antigen: (0)** no presence of immunolabeled cells; **(1)** occasional presence of immunolabeled cells; **(2)** mild presence of immunolabeled cells; **(3)** moderate presence of immunolabeled cells; **(4)** abundant presence of immunolabeled cells.

| <b>Positive cells<br/>(IHC-p30/CP204L)</b> | <b>Pig No.</b> | <b>Pig No.</b> | <b>Pig No.</b> | <b>Pig No.</b> | <b>Observations/notes</b> |
|--------------------------------------------|----------------|----------------|----------------|----------------|---------------------------|
| <b>Bone marrow</b>                         |                |                |                |                |                           |
| -Granulocytic cells                        |                |                |                |                |                           |
| -Megakaryocytes                            |                |                |                |                |                           |
| -Reticular/myeloid cells                   |                |                |                |                |                           |
| -Other cells/area                          |                |                |                |                |                           |
| <b>Skin</b>                                |                |                |                |                |                           |
| <b>Epidermis</b>                           |                |                |                |                |                           |
| -Epithelium                                |                |                |                |                |                           |
| <b>Dermis</b>                              |                |                |                |                |                           |
| -Intravascular monocytes/neutrophils       |                |                |                |                |                           |
| -Perivascular mononuclear infiltrate       |                |                |                |                |                           |
| -Endothelial cells (capillaries)           |                |                |                |                |                           |
| -Reticular cells                           |                |                |                |                |                           |
| -Other cells/area                          |                |                |                |                |                           |
| <b>Liver</b>                               |                |                |                |                |                           |
| -Circulating monocytes                     |                |                |                |                |                           |
| -Kupffer's cells                           |                |                |                |                |                           |
| -Interstitial macrophages                  |                |                |                |                |                           |
| -Hepatocytes                               |                |                |                |                |                           |
| -Other cells/area                          |                |                |                |                |                           |

\*The morphological identification of cells immunolabeled against viral antigen in each of the histological areas/structures evaluated must be also included.

**Scoring of cells immunolabeled for viral antigen:** (0) no presence of immunolabeled cells; (1) occasional presence of immunolabeled cells; (2) mild presence of immunolabeled cells; (3) moderate presence of immunolabeled cells; (4) abundant presence of immunolabeled cells.
