# Supplementary material for: Evaluation of Lesions and Viral Antigen Distribution in Domestic Pigs Inoculated Intranasally with African Swine Fever Virus Ken05/Tk1 (Genotype X)
Source: MDPI journal article supplement (doi:10.3390/pathogens10060768), 2021-06-18
Supplement: s1 [file s1]

| <b>Histopathologic lesions</b>                                                               | <b>Pig No.</b> | <b>Pig No.</b> | <b>Pig No.</b> | <b>Pig No.</b> | <b>Observations/notes</b> |
|----------------------------------------------------------------------------------------------|----------------|----------------|----------------|----------------|---------------------------|
| <b>Lung</b> (pulmonary lobe: )                                                               |                |                |                |                |                           |
| -Hyperaemia/angiectasia                                                                      |                |                |                |                |                           |
| -Haemorrhages (perivascular/peribronchial/alveolar)                                          |                |                |                |                |                           |
| -Vasculopathy*/microthrombosis                                                               |                |                |                |                |                           |
| -Interstitial oedema                                                                         |                |                |                |                |                           |
| -Alveolar oedema                                                                             |                |                |                |                |                           |
| -Thickening of alveolar septal                                                               |                |                |                |                |                           |
| -Cells in alveolar lumen                                                                     |                |                |                |                |                           |
| -Cell debris/fibrin in alveolar lumen                                                        |                |                |                |                |                           |
| -Cell death/cellular fragmentation in BAL/TBMs                                               |                |                |                |                |                           |
| -Bronchi and bronchioles with cell debris, fibrin and detached epithelium/inflammatory cells |                |                |                |                |                           |
| -Peribronchial/bronchiolar mononuclear infiltrates                                           |                |                |                |                |                           |
| <b>Pleura</b>                                                                                |                |                |                |                |                           |
| -Pleural thickening                                                                          |                |                |                |                |                           |
| -Fibrinous pleuritis                                                                         |                |                |                |                |                           |

\*Vasculopathy: prominent diffuse endothelial activation (cellular hypertrophy, rounded nuclei) and variable smooth myocyte vacuolation of tunica media of small and medium vessels, with (vasculitis)/without intramural inflammatory infiltration.

(BALT): bronchus-associated lymphoid tissue; (TBMs): tingible body macrophages.

**Histopathological scoring system: (0)** No lesion; **(1)** Minimal lesion; **(2)** Mild lesion; **(3)** Moderate lesion; **(4)** Severe lesion.

| <b>Histopathologic lesions</b>                | <b>Pig No.</b> | <b>Pig No.</b> | <b>Pig No.</b> | <b>Pig No.</b> | <b>Observations/notes</b> |
|-----------------------------------------------|----------------|----------------|----------------|----------------|---------------------------|
| <b>Distal ileum</b>                           |                |                |                |                |                           |
| -Shortened/thickened mucosal villi            |                |                |                |                |                           |
| -Mononuclear infiltrate in lamina propria     |                |                |                |                |                           |
| -Hyperaemia/haemorrhages (submucosa/serosa)   |                |                |                |                |                           |
| -Lymphoid depletion of Peyer's patches/ IFA   |                |                |                |                |                           |
| -Cellular fragmentation/TBMs                  |                |                |                |                |                           |
| -Vasculopathy*                                |                |                |                |                |                           |
| <b>Ileocaecal valve</b>                       |                |                |                |                |                           |
| -Mononuclear infiltrate in lamina propria     |                |                |                |                |                           |
| -Hyperaemia/haemorrhages (submucosa/serosa)   |                |                |                |                |                           |
| -Lymphoid depletion of lymphoid follicles/IFA |                |                |                |                |                           |
| -Cellular fragmentation/TBMs                  |                |                |                |                |                           |
| -Vasculopathy*                                |                |                |                |                |                           |
| <b>Colon</b>                                  |                |                |                |                |                           |
| -Hyperaemia/haemorrhages (epithelium)         |                |                |                |                |                           |
| -Mononuclear infiltrate (lamina propria)      |                |                |                |                |                           |
| -Hyperaemia/haemorrhages/ oedema (submucosa)  |                |                |                |                |                           |
| -Lymphoid depletion of lymphoid follicles     |                |                |                |                |                           |
| -Cellular fragmentation/TBMs                  |                |                |                |                |                           |
| -Vasculopathy*                                |                |                |                |                |                           |

\*Vasculopathy: prominent diffuse endothelial (EC) activation (cellular hypertrophy, rounded nuclei) and variable smooth myocyte vacuolation of tunica media of small and medium vessels with (vasculitis)/without intramural inflammatory infiltration; (IFA): interfollicular area; (TBMs): tingible body macrophages.

**Histopathological scoring system: (0) No lesion; (1) Minimal lesion; (2) Mild lesion; (3) Moderate lesion; (4) Severe lesion.**

| <b>Histopathologic lesions</b>                                | <b>Pig No.</b> | <b>Pig No.</b> | <b>Pig No.</b> | <b>Pig No.</b> | <b>Observations/notes</b> |
|---------------------------------------------------------------|----------------|----------------|----------------|----------------|---------------------------|
| <b>Kidney</b><br>-Congestion<br>(cortex/medulla/renal pelvis) |                |                |                |                |                           |
| -Haemorrhages (cortex/medulla/renal pelvis)                   |                |                |                |                |                           |
| -Interstitial nephritis/cellular fragmentation                |                |                |                |                |                           |
| -Membranoproliferative glomerulonephritis                     |                |                |                |                |                           |
| -Tubulonephrosis<br>(intratubular hyaline droplets/casts)     |                |                |                |                |                           |
| -Vasculopathy*/Microthrombosis                                |                |                |                |                |                           |

\*Vasculopathy: prominent diffuse endothelial cell (EC) activation (cellular hypertrophy, rounded nuclei) and variable smooth myocyte vacuolation of tunica media of small and medium vessels with (vasculitis)/without intramural inflammatory infiltration.

**Histopathological scoring system: (0)** No lesion; **(1)** Minimal lesion; **(2)** Mild lesion; **(3)** Moderate lesion; **(4)** Severe lesion.

| <b>Histopathologic lesions</b>                      | <b>Pig No.</b> | <b>Pig No.</b> | <b>Pig No.</b> | <b>Pig No.</b> | <b>Observations/notes</b> |
|-----------------------------------------------------|----------------|----------------|----------------|----------------|---------------------------|
| <b>Spleen</b>                                       |                |                |                |                |                           |
| -Engorgement of red pulp sinuses                    |                |                |                |                |                           |
| -Follicular lymphoid depletion                      |                |                |                |                |                           |
| -Periarteriolar lymphoid sheaths (PLS) depletion    |                |                |                |                |                           |
| Cellular fragmentation/TBMs in LF/PLS               |                |                |                |                |                           |
| -Haemorrhages within white pulp structures          |                |                |                |                |                           |
| -Vascular damage*/fibrin deposits                   |                |                |                |                |                           |
| -Ellipsoids increased in size/depletion             |                |                |                |                |                           |
| <b>Thymus</b>                                       |                |                |                |                |                           |
| -Congestion/haemorrhages (cortex/medulla)           |                |                |                |                |                           |
| -Cortex atrophy (cortex)                            |                |                |                |                |                           |
| -Lymphoid depletion (medulla)                       |                |                |                |                |                           |
| Cellular fragmentation/TBMs in cortex/medulla       |                |                |                |                |                           |
| -Vasculitis*/perivasculitis                         |                |                |                |                |                           |
| <b>Tonsil</b>                                       |                |                |                |                |                           |
| -Hyperaemia / Haemorrhages                          |                |                |                |                |                           |
| -Mononuclear infiltrates (epithelium of the crypts) |                |                |                |                |                           |
| -Follicular lymphoid depletion                      |                |                |                |                |                           |
| -Depletion in interfollicular areas (IFA)           |                |                |                |                |                           |
| Cellular fragmentation/TBMs in LF/IFA               |                |                |                |                |                           |
| -Vasculopathy*                                      |                |                |                |                |                           |
| -Connective tissue proliferation (IFA)              |                |                |                |                |                           |

\*Vasculopathy: prominent diffuse endothelial cell (EC) activation (cellular hypertrophy, rounded nuclei) and variable smooth myocyte vacuolation of tunica media of small and medium vessels with (vasculitis)/without intramural inflammatory infiltration; (LF): lymphoid follicles; (IFA) interfollicular areas; (PLS): periarterial lymphoid sheaths; (TBMs): tingible body macrophages.

**Histopathological scoring system: (0) No lesion; (1) Minimal lesion; (2) Mild lesion; (3) Moderate lesion; (4) Severe lesion.**

| <b>Histopathologic lesions</b>          | <b>Pig No.</b> | <b>Pig No.</b> | <b>Pig No.</b> | <b>Pig No.</b> | <b>Observations/notes</b> |
|-----------------------------------------|----------------|----------------|----------------|----------------|---------------------------|
| <b>Lymph nodes</b>                      |                |                |                |                |                           |
| LN identification:                      |                |                |                |                |                           |
| -Hyperaemia/congestion                  |                |                |                |                |                           |
| -Haemorrhages                           |                |                |                |                |                           |
| -Follicular lymphoid depletion          |                |                |                |                |                           |
| -Interfollicular area depletion         |                |                |                |                |                           |
| -Cellular fragmentation/TBMs in LF/IFA. |                |                |                |                |                           |
| -Vascular damage*/fibrin deposits       |                |                |                |                |                           |
| <b>Bone marrow</b>                      |                |                |                |                |                           |
| -Hypocellularity                        |                |                |                |                |                           |
| -Cell debris                            |                |                |                |                |                           |
| -Fibrin strands                         |                |                |                |                |                           |
| -Microhaemorrhages                      |                |                |                |                |                           |
| -MKs (relative number)                  |                |                |                |                |                           |
| -Presence of apoptotic MKs              |                |                |                |                |                           |
| -Presence of cloud-nuclei MKs/Clusters  |                |                |                |                |                           |
| -Emperipolesis                          |                |                |                |                |                           |

\*(Vasculopathy): prominent diffuse endothelial cell (EC) activation (cellular hypertrophy, rounded nuclei) and variable smooth myocyte vacuolation of tunica media of small and medium vessels with (vasculitis)/without intramural inflammatory infiltrations.

(MK): megakaryocytes; (LF): lymphoid follicles; (IFA): interfollicular areas; (TBMs) tingible body macrophages.

(Cloud-nuclei MKs): megakaryocytes with elongated cytoplasm and a round, balloon-shaped nucleus located at one end of the cell.

(Apoptotic MKs): megakaryocytes with condensed, compact hyperchromatic nucleus; cytoplasm was either absent or formed a small perinuclear halo.

(Emperipolesis): morphological normal neutrophils, embedded in MK cytoplasm.

**Histopathological scoring system: (0) No lesion; (1) Minimal lesion; (2) Mild lesion; (3) Moderate lesion; (4) Severe lesion.**

| <b>Histopathologic lesions</b>                               | <b>Pig No.</b> | <b>Pig No.</b> | <b>Pig No.</b> | <b>Pig No.</b> | <b>Observations/notes</b> |
|--------------------------------------------------------------|----------------|----------------|----------------|----------------|---------------------------|
| <b>Skin</b>                                                  |                |                |                |                |                           |
| <b>Epidermis</b>                                             |                |                |                |                |                           |
| -Subcorneal/intraepithelial pustules                         |                |                |                |                |                           |
| -Inflammatory mononuclear infiltrates                        |                |                |                |                |                           |
| -Necrotizing ulcerative dermatitis                           |                |                |                |                |                           |
| <b>Dermis</b>                                                |                |                |                |                |                           |
| -Folliculitis                                                |                |                |                |                |                           |
| -Intravascular monocytes/neutrophils                         |                |                |                |                |                           |
| -Perivascular mononuclear infiltrate/apoptosis               |                |                |                |                |                           |
| -Perivascular oedema                                         |                |                |                |                |                           |
| -Inflammatory interstitial infiltrates/apoptosis             |                |                |                |                |                           |
| -Vasculitis*, necrosis, fibrin in blood vessels              |                |                |                |                |                           |
| -Hyperemia                                                   |                |                |                |                |                           |
| -Microhaemorrhages                                           |                |                |                |                |                           |
| <b>Liver</b>                                                 |                |                |                |                |                           |
| -Angiectasia (PT/CV)/hepatic sinusoids expanded              |                |                |                |                |                           |
| -Haemorrhages.                                               |                |                |                |                |                           |
| -Vasculopathy*/ Microthrombosis                              |                |                |                |                |                           |
| -Interstitial mononuclear infiltrates                        |                |                |                |                |                           |
| -Interstitial cellular fragmentation                         |                |                |                |                |                           |
| -Necrotic foci in lobules                                    |                |                |                |                |                           |
| -Enlarged Kupffer cells in hepatic sinusoids                 |                |                |                |                |                           |
| Increase of circulating leukocytes (sinusoidal leucocytosis) |                |                |                |                |                           |
| -Hypertrophy/hyperplasia of bile ducts                       |                |                |                |                |                           |

\*(Vasculopathy): prominent diffuse endothelial (EC) activation (cellular hypertrophy, rounded nuclei) and variable smooth myocyte vacuolation of tunica media of small and medium vessels with (vasculitis)/without intramural inflammatory infiltrations. (PT): portal triad; (CV): central vein

**Histopathologic lesions: (0)** No lesion; **(1)** Minimal lesion; **(2)** Mild lesion; **(3)** Moderate lesion; **(4)** Severe lesion.
